# Supplementary material for: HPE1, an Effector from Zebra Chip Pathogen Interacts with Tomato Proteins and Perturbs Ubiquitinated Protein Accumulation
Source: MDPI journal article supplement (doi:10.3390/ijms22169003), 2021-08-20
Supplement: s1 [file s1]

**Table S1. Primers used in this study.**

| <b>Primer</b>     | <b>Sequence (5'-3')</b>          | <b>Purpose</b>                      |
|-------------------|----------------------------------|-------------------------------------|
| SIRADa-AD-F       | CACCCATATGAAGCTCACTGTAAAGACTCTC  | SIRAD23a Y2H prey cloning           |
| SIRADa-AD-R       | CGTATCGATATCTTCATAATCTCCTGCATGC  | SIRAD23a Y2H prey cloning           |
| SIRADc-AD-F       | CACCCATATGAAGATTTTTGTGAAAACCTCTC | SIRAD23c Y2H prey cloning           |
| SIRADc-AD-R       | CGTATCGATCTCTTCAAACCTCGTGAATGTGA | SIRAD23c Y2H prey cloning           |
| SIRADd-AD-F       | CACCCATATGAAGATTTTTGTGAAGACTTTG  | SIRAD23d Y2H prey cloning           |
| SIRADd-AD-R       | CGTATCGATTTCATCAAACCTCATGCATGTG  | SIRAD23d Y2H prey cloning           |
| SIRADe-AD-F       | GCGGAATTCATGAAGATTTTCGTGAAGAC    | SIRAD23e Y2H prey cloning           |
| SIRADe-AD-R       | GCGGGATCCTCACTCGTCAAACCTCATGCAAG | SIRAD23e Y2H prey cloning           |
| BcRAD-AD-F        | GCGGAATTCATGAAGCTAACGATTAAAAATC  | BcRAD23 Y2H prey cloning            |
| BcRAD-AD-R1       | ATCGCTCGAGGTCGTCCATGTTTTGCGAGAG  | BcRAD23 Y2H prey cloning            |
| BcRAD-AD-R2       | GCGGGATCCAGGCTTTGGTTTGGACAACAT   | BcRAD23-UBL prey cloning            |
| HPE1A-BD-F        | CACCGAATTCATGCACCATCCCATTAAGACAC | HPE1-A Y2H Bait cloning             |
| HPE1A-BD-R        | GCGGGATCCTTAGTGACGCGCAGAATCA     | HPE1-A Y2H Bait cloning             |
| HPE1B-BD-F        | CACCGAATTCATGCACCATCCTATTAGGACAC | HPE1-B Y2H Bait cloning             |
| HPE1B-BD-R        | GCGGGATCCTTACTGATGCGCAGAATCC     | HPE1-B Y2H Bait cloning             |
| SIRADe-GW-R       | CTCGTCAAACCTCATGCAAGTGA          | SIRAD23e pENTR cloning              |
| HPE1B-GW-R        | CTGATGCGCAGAATCCTTAA             | HPE1-B pENTR cloning                |
| Lso-F             | CGAGCGCTTATTTTAAATAGGAGC         | Lso infection diagnostic            |
| Lso-R             | GCCTCGCGATTTCGCAACCCAT           | Lso infection diagnostic            |
| EF1alpha-F        | GAAGGTCGGTTACAACCCTGAC           | EF1 $\alpha$ housekeeping gene      |
| EF1alpha-R        | GAGCATATCCGTTTCCAATCTG           | EF1 $\alpha$ housekeeping gene      |
| HPE1B-qF          | TGTCAAATGTCTAAGTTGCGAATTG        | HPE1 T <sub>0</sub> gene expression |
| HPE1B-qR          | ATCGGTCATGACTATGGCATT            | HPE1 T <sub>0</sub> gene expression |
| BcRAD23 start F   | ATGAAGCTAACGATTAAAAATCTTC        | BcRAD23 OE-PCR                      |
| BcRAD23-mCherry F | CAAAACATGGACGACATGGTGAGCAAGGGC   | BcRAD23 OE-PCR                      |
| BcRAD23-mCherry R | GCCCTTGCTCACCATGTCTGTCATGTTTTG   | BcRAD23 OE-PCR                      |
| mCherry R         | CTACTTGACAGCTCGTC                | BcRAD23 OE-PCR                      |
| Lso4420B start F  | ATGCAGTCAGTTTATGAAATACAC         | HPE1B OE-PCR                        |
| Lso4420B-EGFP F   | GATTCTGCGCATCAGATGGTGAGCAAGGGC   | HPE1B OE-PCR                        |
| Lso4420B-EGFP R   | GCCCTTGCTCACCATCTGATGCGCAGAATC   | HPE1B OE-PCR                        |
| EGFP R            | GACTTGACAGCTCGTCC                | HPE1B OE-PCR                        |
